# Supplementary material for: Synthesis, Characterization, and Docking Study of a Novel Indole Derivative Containing a Tosyl Moiety as Anti-oxidant Agent
Source: Preprints.org preprint supplement (doi:10.20944/preprints202407.0909.v1), 2024-07-11

# Synthesis, characterization, and docking study of a novel indole derivative containing a tosyl moiety as anti-oxidant agent

Abdelali Chihab<sup>1</sup>, Nabil El Brahmi<sup>1</sup> and Saïd El Kazzouli<sup>1,\*</sup>

<sup>1</sup> *Euromed University of Fes (UEMF), Morocco.*

\* Correspondence: [s.elkazzouli@ueuromed.org](mailto:s.elkazzouli@ueuromed.org)

## Supplementary materials

Figure S1.  $^1\text{H}$  NMR spectrum (600 MHz,  $\text{CDCl}_3$ ) of 2.

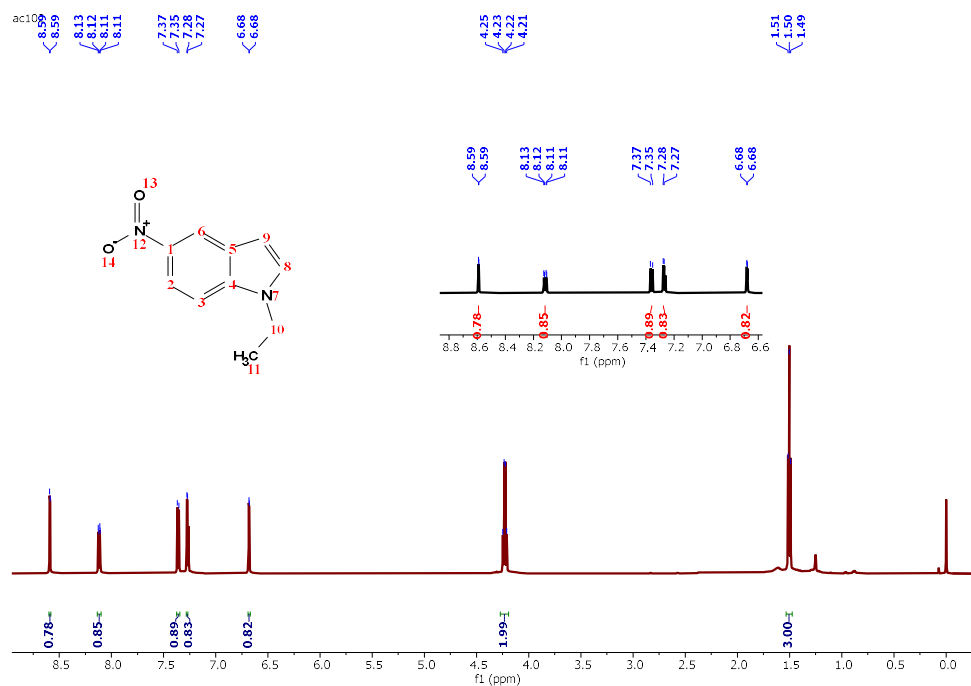

Figure S2.  $^1\text{H}$  NMR spectrum (600 MHz,  $\text{CDCl}_3$ ) of 3.

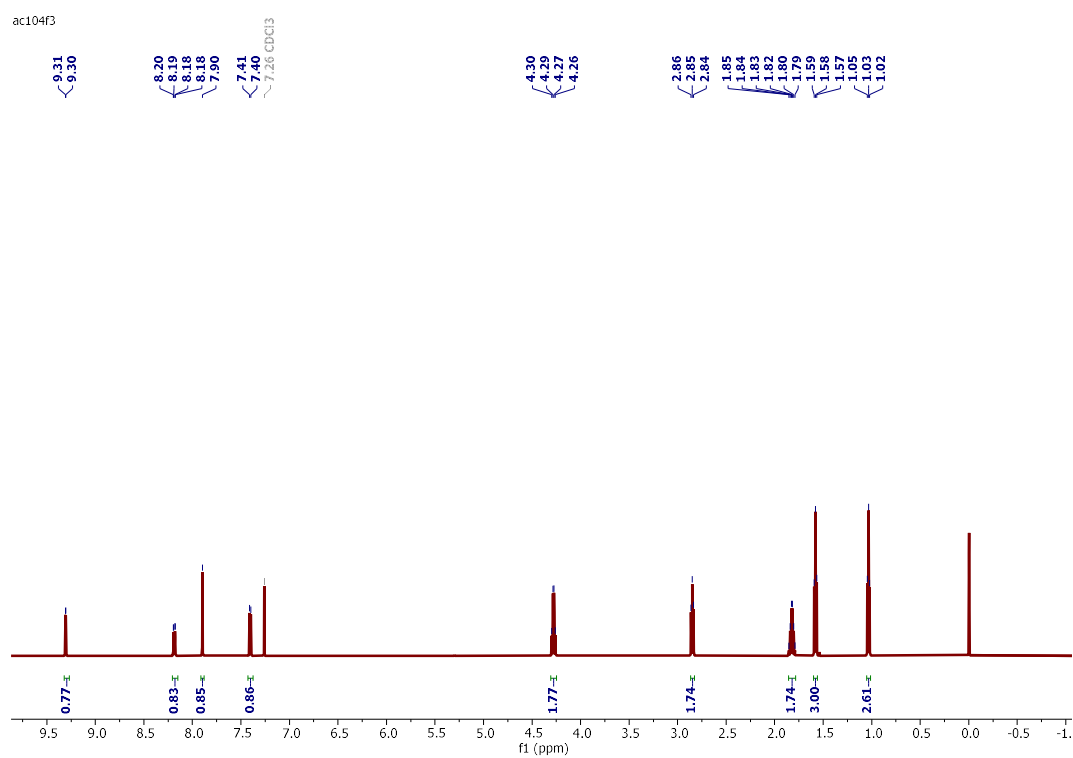

Figure S3.  $^{13}\text{C}$  NMR spectrum (151 MHz,  $\text{CDCl}_3$ ) of **3**.

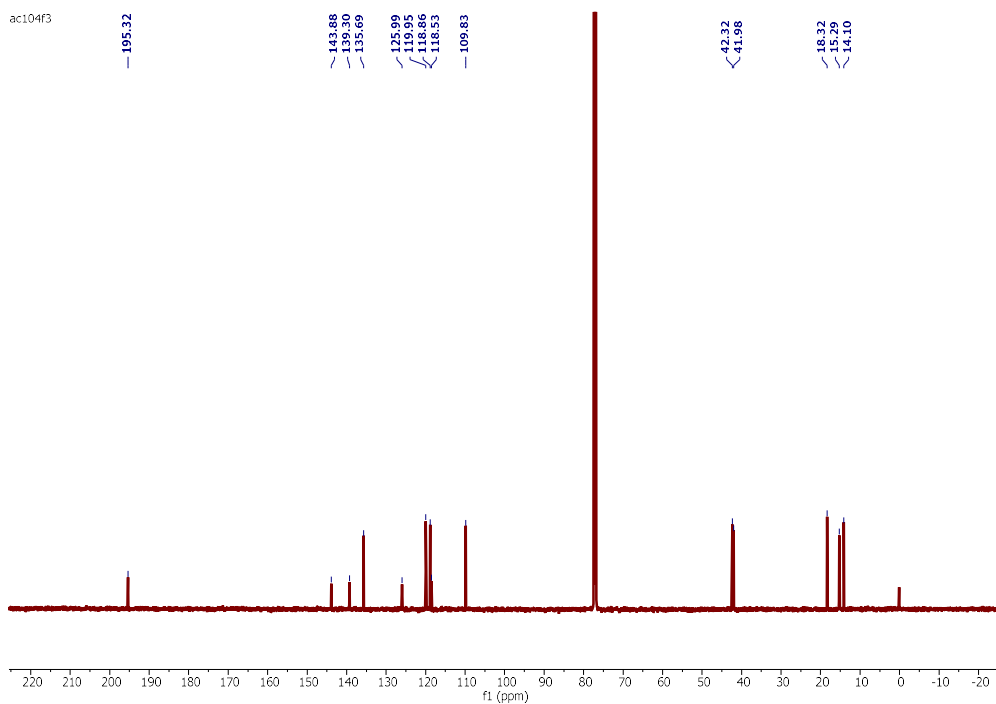

Figure S4.  $^1\text{H}$  NMR spectrum (600 MHz,  $\text{CDCl}_3$ ) of **4**.

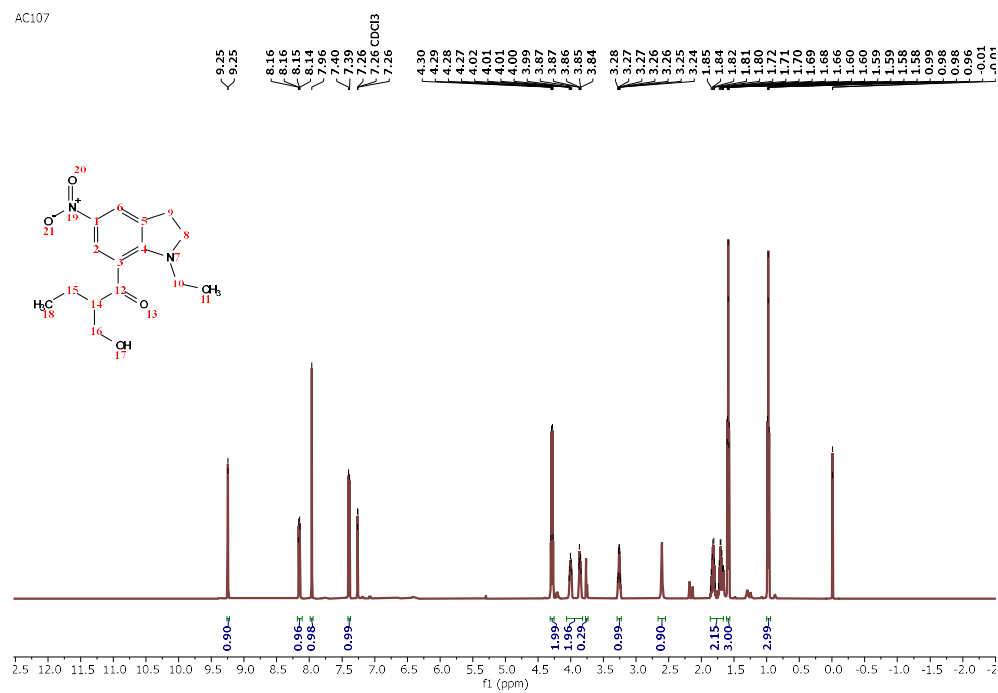

Figure S5.  $^{13}\text{C}$  NMR spectrum (151 MHz,  $\text{CDCl}_3$ ) of **4**.

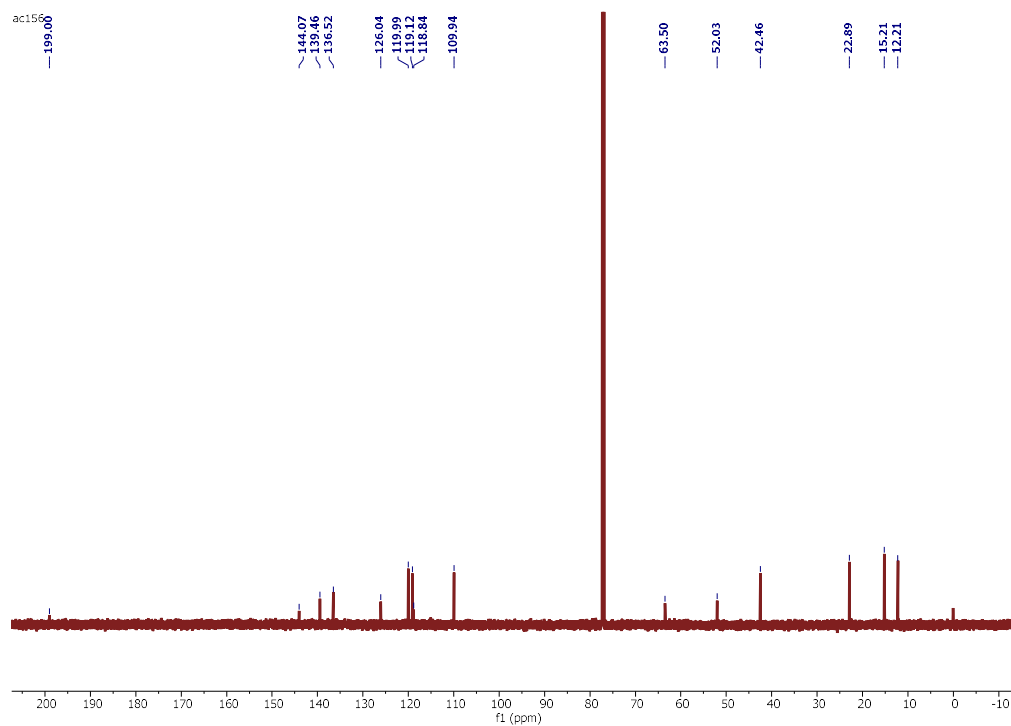

Figure S6.  $^{13}\text{C}$  NMR spectrum (151 MHz,  $\text{CDCl}_3$ ) of **5**.

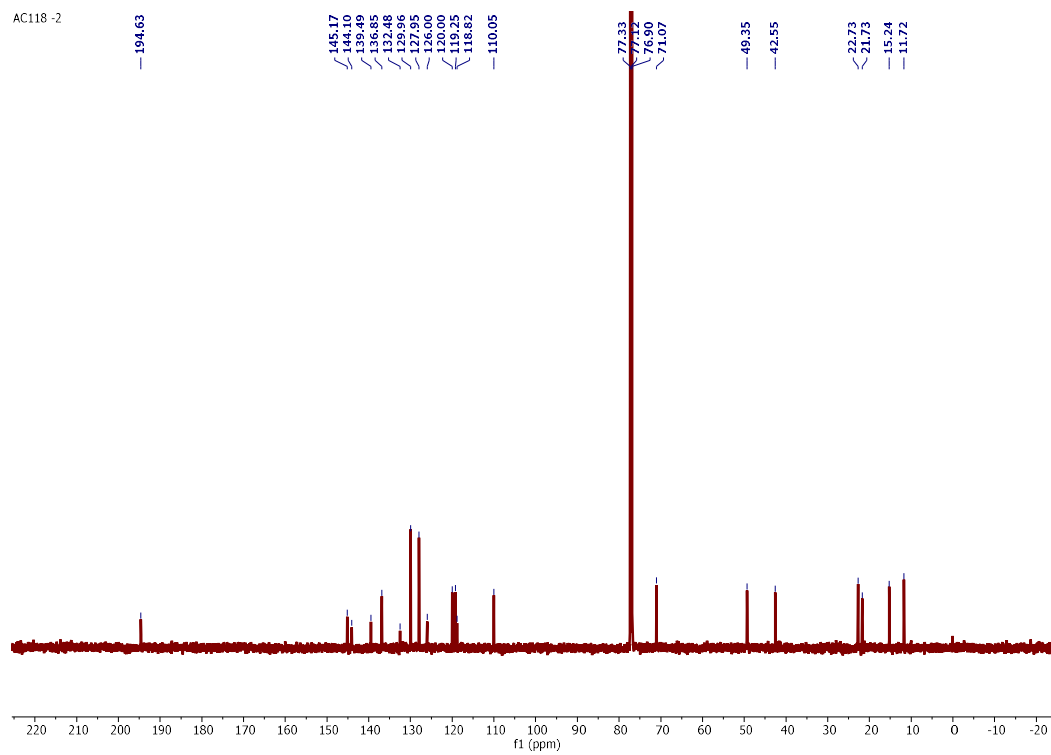

**Figure S7.** HRMS spectrum of 5.

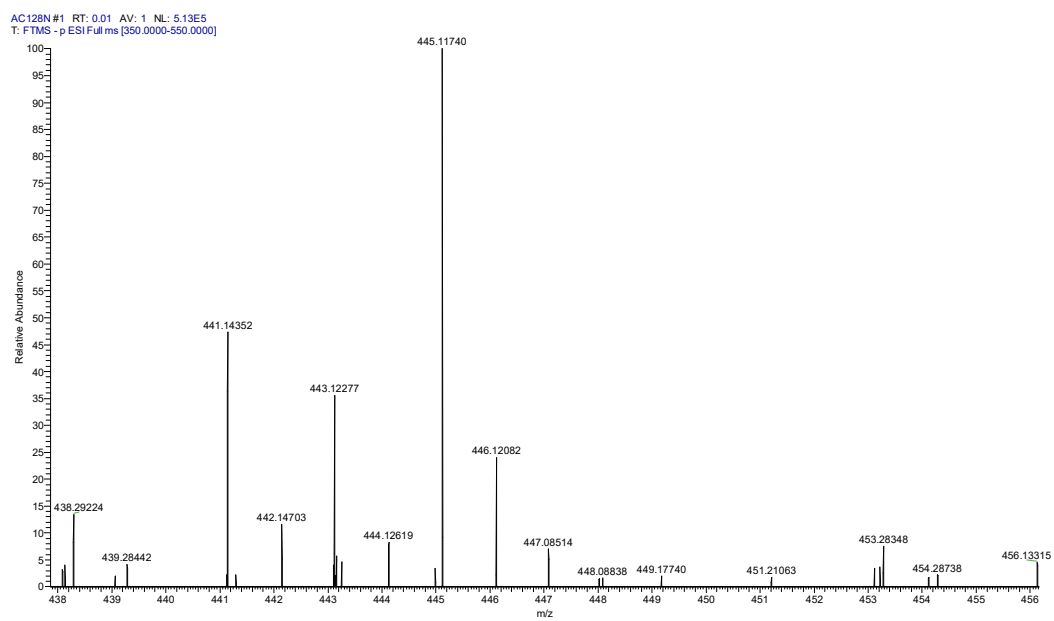

Supplement: Supplementary file 1 [file supplementary]
